## ICOS sustains T<sub>FH</sub> and allergic airway disease

### 26 **ABSTRACT**

27 Allergic asthma is a disease of chronic airway inflammation and remodelling, characterised  
28 by a dysregulated type 2 response and allergen-specific IgE. T follicular helper cells (T<sub>FH</sub>)  
29 are critical to antibody production and have recently been implicated in allergic airway  
30 disease (AAD) pathogenesis. The role of T<sub>FH</sub> in established disease and the therapeutic  
31 potential of targeting them are however not fully understood. Using two aeroallergen driven  
32 murine models of chronic AAD, T<sub>FH</sub> were first identified in the lung draining lymph nodes but  
33 with prolonged exposure were present in the lung itself. Sustained allergen exposure led to  
34 the accumulation of T<sub>FH</sub>, and concomitant development of germinal centre B cells. Blockade  
35 of Inducible T cell co-stimulator (ICOS) signalling during established AAD depleted T<sub>FH</sub>  
36 without adversely affecting the differentiation of other CD4<sup>+</sup> T cell subsets. This resulted in  
37 impaired germinal centre responses, reduced allergen specific IgE and ameliorated  
38 inflammation and airway hyper-responsiveness, including reduced pulmonary IL-13. T<sub>FH</sub> did  
39 not however appear to produce IL-13 directly, suggesting they indirectly promote type-2  
40 inflammation in the lungs. These data show that T<sub>FH</sub> play a pivotal role in the regulation of  
41 AAD and that targeting the ICOS-L pathway could represent a novel therapeutic approach in  
42 this disease.

43

44

45

46

47

48

49

50

## ICOS sustains T<sub>FH</sub> and allergic airway disease

### 51 INTRODUCTION

52 Allergic asthma is a disease of chronic airway inflammation and remodeling, associated with  
53 a dysregulated type 2 immune response. The disorder is driven by chronic exposure to  
54 aeroallergens, including house dust mite (HDM) and fungal spores, leading to production of  
55 type 2 cytokines, IL-4, IL-5 and IL-13, and the hallmark symptoms of allergen specific  
56 immunoglobulin E (IgE), eosinophilia and airway hyper-responsiveness (AHR)<sup>1</sup>.  
57 Traditionally, the disorder has been described as a T helper 2 (Th2) cell disease, as they  
58 produce type 2 cytokines which drive the pathophysiology. However, it is now clear that  
59 multiple other cells of the immune system can produce these cytokines and thus could play  
60 vital roles in the regulation of distinct asthma phenotypes<sup>1</sup>.

61

62 T<sub>FH</sub> are a specialised subset of CD4<sup>+</sup> T cells with a unique capacity to help B cells produce  
63 high affinity, isotype-switched antibodies and differentiate into memory B cells and plasma  
64 cells<sup>2</sup>. They are defined by expression of CXCR5, PD1, Bcl-6 and ICOS and reside within  
65 the B cell follicles of secondary lymphoid organs, including lymph nodes and the spleen<sup>2-7</sup>.  
66 T<sub>FH</sub> differentiation is a multi-step process. Firstly, within the T cell zone, naive CD4<sup>+</sup> T cells  
67 are presented antigen and receive co-stimulation via inducible T cell co-stimulator ligand  
68 (ICOS-L) from dendritic cells<sup>8</sup>. Next, pre-T<sub>FH</sub>, now expressing Bcl-6 and CXCR5, migrate  
69 towards the T/B cell zone border<sup>9, 10</sup> where antigen presentation and co-stimulation is  
70 transferred to activated B cells<sup>11, 12</sup>. Fully differentiated T<sub>FH</sub> are located in the B cell zone,  
71 within newly formed anatomical structures called germinal centres (GC)<sup>10</sup>. Here, GC B cells  
72 provide antigen and pro-survival ICOS-L stimulation to the T<sub>FH</sub>, which in return provide pro-  
73 survival and anti-apoptotic signals to the B cells<sup>2, 9, 11</sup>.

74

75 A handful of studies have now attempted to dissect the role of T<sub>FH</sub> during AAD pathogenesis.  
76 T<sub>FH</sub> have been identified in the lymph nodes and spleens of HDM sensitised and challenged  
77 animals<sup>13-15</sup> and have been shown to be critical to the production of allergen specific IgE<sup>16, 17</sup>.  
78 T<sub>FH</sub> generated in lung draining lymph nodes have been shown to become Th2 cells which

## ICOS sustains T<sub>FH</sub> and allergic airway disease

79 migrate to the lungs on allergen challenge and promote exacerbated HDM mediated AAD<sup>15</sup>.  
80 In contrast, adoptive transfer of IL-21<sup>+</sup> T<sub>FH</sub> into non-sensitised animals failed to generate Th2  
81 cells on HDM exposure, but drove airway eosinophilia<sup>13</sup>. Interestingly, during Th2 pathology  
82 T<sub>FH</sub> have been shown to differentiate out of the Th2 lineage<sup>18</sup> and even obtain effector  
83 functions related to other CD4<sup>+</sup> T cell lineages<sup>19</sup>. While, Bcl-6 deficient CD4<sup>+</sup> T cells, unable  
84 to differentiate into T<sub>FH</sub>, can more readily become lung resident Th2 cells and drive AAD<sup>14</sup>.  
85 Taken together, these studies imply T<sub>FH</sub> are important to allergic disease but their precise  
86 role remains unclear, and the therapeutic potential of targeting them is untested.

87

88 In this study using two chronic allergen exposure models mimicking the repeated  
89 environmental exposures that allergic asthmatics experience, T<sub>FH</sub> were readily identified  
90 within the secondary lymphoid organs and the lung tissue itself. ICOS is a co-stimulatory  
91 molecule required for T cell activation expressed on all CD4<sup>+</sup> T cells following T cell receptor  
92 engagement<sup>20</sup>. T<sub>FH</sub>, but not other CD4 T cell subsets, require sustained ICOS/ICOS-L  
93 signalling after priming to maintain their phenotype<sup>21, 22</sup>. Fitting with this T<sub>FH</sub> and GC B cells  
94 could be specifically reduced by ICOS-L blockade even after allergic disease had been  
95 established. Importantly therapeutic blockade of T<sub>FH</sub> dampened hallmark features of allergic  
96 disease, including eosinophilia, AHR, allergen specific IgE production and reduced  
97 pulmonary IL-13. These findings suggest blocking ICOS/ICOS-L interactions and targeting  
98 T<sub>FH</sub> responses can provide therapeutic benefit in established AAD.

99

100

101

102

103

## ICOS sustains $T_{FH}$ and allergic airway disease

### 104 **RESULTS**

#### 105 *Chronic allergen exposure generates local and systemic $T_{FH}$ responses*

106 Allergic asthma is a disease of chronic pulmonary inflammation driven by repeated low dose  
107 exposure to aeroallergens. To mimic the pathogenesis *in vivo* and determine if responses  
108 were antigen dependent, mice were exposed to two common aeroallergens; either house  
109 dust mite (HDM) or *Alternaria alternata* (ALT) 3 times a week for up to 5 weeks (Figure 1A).

110  
111  $T_{FH}$  (defined as CXCR5<sup>+</sup>PD1<sup>+</sup>Foxp3<sup>-</sup>CD4<sup>+</sup>) were observed in the lung draining mediastinal  
112 lymph nodes (mLN) of HDM or ALT treated animals after 1 week and very few were  
113 observed in mice only exposed to PBS (Figure 1B, C and Supplementary figure S1A).  
114 Continued allergen exposure further increased  $T_{FH}$  proportions in the mLN after 3 and 5  
115 weeks. (Figure 1B, C and Supplementary figure S1A). Elevated  $T_{FH}$  frequencies were also  
116 found in the spleen, but only after 3 weeks of allergen exposure (Figure 1D, E and  
117 Supplementary figure S1B). Moreover,  $T_{FH}$  were observed at the site of inflammation, with  
118 HDM inhalation causing consistently elevated lung  $T_{FH}$  frequencies between weeks 3 and 5  
119 (Figure 1F, Supplementary figure S1C). ALT lung  $T_{FH}$  were significantly increased at 3  
120 weeks compared to PBS controls but only reached a frequency comparable to HDM after 5  
121 weeks of exposure (Figure 1G, Supplementary figure S1C). Circulating  $T_{FH}$  were not  
122 observed in either model (Supplementary figure S2A-C). Taken together this showed that  
123 prolonged allergen exposure induced both tissue resident and systemic  $T_{FH}$  responses that  
124 increased in frequency over time.  $T_{FH}$  responses were established across all sites after 3  
125 weeks of exposure.

#### 126 127 *B cell responses and antibody development are preceded by $T_{FH}$ responses during AAD*

128  $T_{FH}$  regulate antibody responses by directly interacting with activated B cells, driving the  
129 formation of germinal centres (GC), where isotype switching, affinity maturation and B cell  
130 maturation occurs<sup>2</sup>. GC B cells (defined as CD38<sup>-</sup>GL7<sup>+</sup>FAS<sup>+</sup>CD19<sup>+</sup>B220<sup>+</sup>) were absent in the  
131 mLN and lungs after 1 week of aero-allergen inhalation and were comparable to PBS treated

## ICOS sustains $T_{FH}$ and allergic airway disease

132 mice (Figure 2A-D, Supplementary figure S3A). However, after 3 weeks of exposure to  
133 either aeroallergen, GC B cell frequencies were significantly elevated in the mLN, remaining  
134 consistently raised between weeks 3 and 5. (Figure 2A, C and Supplementary figure S3A).  
135 Lung GC B cells were also observed in HDM exposed animals at 3 weeks (Figure 2B and  
136 Supplementary figure S3B), while only after 5 weeks of ALT exposure were lung GC B cell  
137 frequencies significantly increased compared to PBS controls (Figure 2D and  
138 Supplementary figure S3B). Similarly, GC B cells were identified in the spleen of allergen  
139 exposed animals after 3 weeks (Supplementary figure S3C).

140

141 Allergen specific antibody, in particular IgE, is a hallmark feature of AAD. Total and allergen  
142 specific IgE and IgG1 were only detectable in allergen exposed mice after 3 weeks (Figure  
143 2E-L). Sustained exposure to HDM did not further alter the concentration of total or specific  
144 IgE (Figure 2E, I), but did increase IgG1 production (Figure 2F, J). Total and ALT specific  
145 IgE and IgG1 were substantially increased at 5 weeks compared to 3 weeks (Figure 2G, H,  
146 K, L). Allergen specific antibodies were undetectable in the serum of PBS exposed animals  
147 (Figure 2I-L). This data shows the ability of chronic allergen exposure to generate local and  
148 systemic GC B cell responses and the subsequent emergence of allergen specific antibody  
149 titres that increase over time and are preceded by  $T_{FH}$  activity.

150

### 151 *ICOS/ICOS-L interactions are required to sustain $T_{FH}$ during chronic AAD*

152  $T_{FH}$  require sustained signalling via ICOS to maintain their phenotype, and can be depleted  
153 by disrupting interactions between ICOS and its ligand, ICOS-L<sup>9, 22</sup>. To evaluate whether  $T_{FH}$   
154 proportions could be reduced during established chronic allergic disease, mice were  
155 exposed to aeroallergens for 5 weeks and co-administered anti-ICOS-L antibody ( $\alpha$ -ICOS-L)  
156 or an isotype control (2A3) in the last two weeks of allergen exposure (weeks 4 and 5). Mice  
157 were culled at the end of week 5 (Supplementary figure S4). 3 weeks of allergen exposure  
158 was sufficient to establish HDM and ALT driven allergic disease, including pulmonary

## ICOS sustains $T_{FH}$ and allergic airway disease

159 inflammation, eosinophilia and AHR<sup>23-25</sup>.  $\alpha$ -ICOS-L treatment substantially reduced mLN and  
160 lung  $T_{FH}$  populations after HDM exposure compared to 2A3 treated animals (Figure 3A-C).  
161 Similar results were observed with ALT (Figure 3A, D-E). Consistent with the reduced  $T_{FH}$   
162 response, mLN and lung GC B cell responses induced by HDM inhalation were decreased in  
163 mice treated with  $\alpha$ -ICOS-L compared to those given 2A3 (Figure 3F-H). In contrast, mLN  
164 GC B cells remained elevated in the ALT study (Figure 3F, I) and only lung proportions were  
165 reduced by  $\alpha$ -ICOS-L treatment (Figure 3F, J).  $\alpha$ -ICOS-L intervention caused decreased  
166 serum HDM-specific IgE (Figure 3K) while ALT specific IgE showed a trend to significant  
167 decrease (Figure 3L). Allergen specific IgG1 remained stable in both models after  $\alpha$ -ICOS-L  
168 intervention (Figure 3M, N). Consistent with the reduced HDM specific IgE, but not ALT  
169 specific IgE,  $\alpha$ -ICOS-L resulted in reduced HDM induced serum mast cell protease 1  
170 (MCPT1) but had no impact on ALT induced MCPT1 (Supplementary figure S5). Taken  
171 together, this data shows that during chronic allergen exposure,  $T_{FH}$  can be successfully  
172 depleted using  $\alpha$ -ICOS-L. The depletion altered GC B cell responses and allergen specific  
173 IgE but not IgG1.

174

### *$\alpha$ -ICOS-L blockade reduces pulmonary inflammation and airway hyperresponsiveness*

176 Airway hyperresponsiveness and inflammation are fundamental indicators of AAD  
177 progression; therefore, the impact of  $\alpha$ -ICOS-L blockade on the global allergic disease  
178 phenotype was examined. Mice exposed to HDM or ALT in combination with 2A3 displayed  
179 elevated cell numbers in the lung compared to PBS treated mice (Figure 4A, B).  $\alpha$ -ICOS-L  
180 administration reduced aeroallergen induced cellular infiltration into the lungs (Figure 4A, B).  
181 Total lung eosinophils were reduced with allergen and  $\alpha$ -ICOS-L co-administration (Figure  
182 4C, D), however, the proportions of lungs eosinophils were unchanged (Supplementary  
183 figure S6).

184

## ICOS sustains $T_{FH}$ and allergic airway disease

185 AHR was evaluated by exposing mice to increasing doses of methacholine (MCh). Allergen  
186 exposure induced AHR, characterised by raised airway resistance and elastance, and  
187 reduced compliance compared to PBS controls (Figure 4E-L). Co-administration of HDM and  
188  $\alpha$ -ICOS-L resulted in reduced airway resistance and elastance and increased compliance,  
189 indicative of improved lung function compared to HDM and 2A3 treated animals (Figure 4E-  
190 G). While  $\alpha$ -ICOS-L treatment substantially decreased ALT induced airway resistance and  
191 elastance (Figure 4I, K) there was no impact on airway compliance (Figure 4J). In both  
192 models, large changes in airway elastance were observed (Figure 4H, L). Despite this,  
193 aeroallergen and  $\alpha$ -ICOS-L administration had no impact on goblet cell hyperplasia  
194 (Supplementary figure S7A-C), collagen deposition (Supplementary figure S7D-F) or airway  
195 smooth muscle hyperplasia and hypertrophy (Supplementary figure S7G-I). However, taken  
196 together the data shows that therapeutic administration of  $\alpha$ -ICOS-L after disease  
197 establishment improved airway inflammation and lung function.

198

199  *$\alpha$ -ICOS-L improves disease by reducing cellular inflammation rather than targeting Th2 cells*  
200 *or ILC2s*

201 To assess the mechanism by which  $\alpha$ -ICOS-L treatment could be facilitating effects on  
202 pulmonary inflammation and AHR, cytokine and chemokine secretion into the lungs was  
203 analysed. HDM or ALT treated animals administered 2A3 had increased IL-13 in their lungs  
204 compared to PBS exposed animals (Figure 5A, B). Therapeutic  $\alpha$ -ICOS-L in combination  
205 with HDM reduced IL-13 in the lungs compared to 2A3 treated mice (Figure 5A) but this  
206 change was not seen during ALT exposure (Figure 5B). Similar trends were observed with  
207 lung IL-17A (Figure 5C, D). Allergen treatment induced IL-5 (Figure 5E, F) and eotaxin-2  
208 (Figure 5G, H), but neither were altered by  $\alpha$ -ICOS-L administration (Figure 5E-H). Thus, the  
209 HDM model appeared to be more susceptible to modulation by therapeutic  $\alpha$ -ICOS-L  
210 treatment than the ALT model.

211



## ICOS sustains $T_{FH}$ and allergic airway disease

212 Given the alteration in pulmonary IL-13 secretion and the importance of IL-13 to allergic  
213 disease pathogenesis, Th2 cells were studied in both models. HDM exposure increased the  
214 frequency of IL-13<sup>+</sup> CD4<sup>+</sup> T cells and this was unchanged by  $\alpha$ -ICOS-L intervention (Figure  
215 6A, B). However, consistent with decreased pulmonary inflammation (Figure 4A), total  
216 numbers of IL-13<sup>+</sup> CD4<sup>+</sup> T cells showed a trend towards reduction with  $\alpha$ -ICOS-L treatment  
217 (Figure 6C). However, in the ALT study IL-13<sup>+</sup> CD4<sup>+</sup> T cells were reduced by  $\alpha$ -ICOS-L  
218 treatment both by proportion and total number (Figure 6A, D-E). Similar trends were  
219 observed for IL-17A<sup>+</sup> CD4<sup>+</sup> T cells which were strongly induced upon HDM exposure and  
220 only decreased in total number consistent with the fall in overall pulmonary inflammation  
221 (Supplementary figure S8A-C). IL-17A<sup>+</sup> CD4<sup>+</sup> T cells were not significantly induced by ALT  
222 inhalation and were unchanged by  $\alpha$ -ICOS-L intervention (Supplementary figure S8A, D-E).

223

224 ILC2s are a major producer of IL-13 during aeroallergen driven allergic disease<sup>26</sup>. HDM or  
225 ALT treatment along with 2A3 resulted in increased numbers of IL-13<sup>+</sup> ILCs compared to  
226 PBS treated controls, but ILC2s were not affected by ICOS-L blockade (Figure 6A, F-G,  
227 Supplementary figure S9A, B). IL-17A<sup>+</sup> ILCs were also analysed and were found unchanged  
228 by ICOS-L blockade during either ALT or HDM exposure by proportion or total number  
229 (Supplementary figure S9C-G). Collectively, these data suggest that  $\alpha$ -ICOS-L antibody can  
230 therapeutically relieve established AAD by reducing pulmonary inflammation and AHR but  
231 not by directly targeting Th2 cells or ILCs.

232

233  $T_{FH}$  have been shown to accumulate and become dysregulated during sustained antigen  
234 exposure<sup>27, 28</sup>. Given that  $T_{FH}$  were reduced together with secreted IL-13 and IL-13<sup>+</sup> CD4<sup>+</sup> T  
235 cells, whether  $T_{FH}$  were capable of producing IL-13 was examined. Using IL-13<sup>GFP</sup> reporter  
236 mice, CXCR5 expression was found to be separated from IL-13<sup>GFP</sup> expression in CD4<sup>+</sup> T  
237 cells within the mLN and lungs (Figure 6H). Consistent with this the IL-13<sup>GFP+</sup> cells were  
238 identified within the non- $T_{FH}$  T effector ( $T_{EFF}$ ) population but not in the  $T_{FH}$  population with the

## ICOS sustains T<sub>FH</sub> and allergic airway disease

239 mLN and lungs (Figure 6I, J). Thus, the reduction of T<sub>FH</sub> was not directly responsible for the  
240 decreased IL-13 observed during HDM driven allergic disease. Despite this, the loss of T<sub>FH</sub>  
241 during chronic AAD was critical for the impaired humoral response and may be indirectly  
242 responsible for the improved AAD. Overall the data presented here indicates  $\alpha$ -ICOS-L  
243 treatment to be a beneficial intervention targeting humoral immunity and other hallmark  
244 symptoms of AAD (summarized in Supplementary Figure S10).

## ICOS sustains T<sub>FH</sub> and allergic airway disease

### 245 **DISCUSSION**

246 AAD is commonly characterised by chronic exposure to aeroallergens, resulting in Th2  
247 biased lung inflammation and dysregulated humoral immunity<sup>1</sup>. Here we sought to examine  
248 the importance of T<sub>FH</sub> in the pathology of AAD and antibody mediated immunity using two  
249 clinically relevant aero-allergens. As expected, chronic allergen exposure resulted in the  
250 progressive development of AAD, including the production of IgE. T<sub>FH</sub> developed over time,  
251 both systemically and locally, and were associated with the presence of GC B cells.  
252 Therapeutic administration of ICOS-L blocking antibodies interrupted T<sub>FH</sub> responses,  
253 decreased humoral immunity and improved hallmark features of AAD.

254

255 In this study, we showed that T<sub>FH</sub> populations were generated in the peripheral lymph nodes  
256 and with prolonged allergen challenge could be detected locally within the lungs. In previous  
257 acute studies T<sub>FH</sub> have been shown to peak between 7 and 14 days post infection or protein  
258 vaccination, declining as antigen availability decreases<sup>29, 30</sup>. Here T<sub>FH</sub> accumulated over time  
259 with repeated allergen exposure, consistent with other chronic disease models, such as  
260 repeated protein immunisations<sup>31</sup>, HIV<sup>32</sup> and chronic LCMV infection<sup>27, 28</sup>. This observation  
261 fits with findings that sustained antigen and thus continuous TCR stimulation favours T<sub>FH</sub>  
262 differentiation and results in more T<sub>FH</sub> in chronic settings than acute<sup>27, 28, 31</sup>.

263

264 Chronic allergen exposure established a local lung T<sub>FH</sub> population. Local T<sub>FH</sub> have been  
265 observed during murine allergic disease<sup>13</sup> and in other chronic human diseases, including  
266 within nasal polyps during chronic rhinosinusitis<sup>33</sup>, the synovial tissue during rheumatoid  
267 arthritis<sup>34</sup> and Hepatitis B<sup>35</sup> and C infected liver tissue<sup>36</sup>. However, we show for the first time  
268 that lung T<sub>FH</sub> are found alongside lung GC B cells. Importantly isolated clusters of lymphoid  
269 cells are also present in the asthmatic lung and have been shown to be larger than in  
270 healthy controls<sup>37</sup>, implicating a role in pathology. This indicates that T<sub>FH</sub> are likely present  
271 and dysregulated within the lungs of asthmatic patients and they may contribute to disease  
272 severity, through both regulating antibody production and Th2 associated pathology.

## ICOS sustains T<sub>FH</sub> and allergic airway disease

273 T<sub>FH</sub> require sustained ICOS/ICOS-L signalling via phosphoinositol 3 kinase (PI3K) after  
274 priming to maintain their phenotype<sup>22</sup>. Common variable immunodeficiency patients with  
275 genetic defects in the ICOS gene fail to generate T<sub>FH</sub><sup>38</sup>, while T<sub>FH</sub> accumulate in *Roquin*  
276 mutants which overexpress ICOS<sup>39, 40</sup>. As a result blocking ICOS/ICOS-L interactions after T  
277 cell activation has been extensively used as a tool in multiple acute models to selectively  
278 deplete T<sub>FH</sub> when antigen is limiting<sup>9, 22, 31</sup>. Here we show that late therapeutic administration  
279 of  $\alpha$ -ICOS-L during established allergic disease can also reduce T<sub>FH</sub> even when antigen is  
280 readily available during ongoing chronic inflammation. Concomitant with reduced T<sub>FH</sub>, GC  
281 responses were impaired and this short intervention reduced HDM-specific IgE, although it  
282 did not alter IgG1 levels over the same timeframe. The half-life of IgE is short in comparison  
283 to other immunoglobulin isotypes<sup>41</sup> and transferred Der p1 and Lol p 1 specific IgE declined  
284 rapidly over a 50-day period while IgG remained relatively stable<sup>42</sup>. Therefore, a longer  
285  $\alpha$ -ICOS-L administration protocol may be required to alter more potent fungal specific IgE or  
286 the more stable IgG1<sup>24</sup>. Nonetheless, consistent with altered HDM-specific IgE levels, serum  
287 MCPT1 was significantly reduced indicating the treatment resulted in reduced mast cell  
288 activation<sup>43</sup>. Critically T<sub>FH</sub> are required for the generation of antibodies including allergen-  
289 specific IgE<sup>16, 17</sup>, therefore this combined with our observation of reduced HDM specific IgE  
290 after a short intervention, highlights the potential of this approach to abrogate IgE driven  
291 clinical symptoms of AAD.

292

293 Alongside its' effects on humoral immunity  $\alpha$ -ICOS-L intervention after disease  
294 establishment improved both HDM and ALT driven AHR. IL-13 is a potent inducer of AHR<sup>44</sup>,  
295 <sup>45</sup> and consistent with this HDM induced pulmonary IL-13 was reduced following  $\alpha$ -ICOS-L  
296 treatment. According to the literature T<sub>FH</sub> are the only CD4<sup>+</sup> T cell subset affected by late  
297 administration of  $\alpha$ -ICOS-L<sup>9, 22</sup>. However, depletion of T<sub>FH</sub> was not directly responsible for  
298 this reduced IL-13 as T<sub>FH</sub> do not appear to be a major IL-13 source, indicating that during  
299 chronic AAD, T<sub>FH</sub> did not acquire a T<sub>FH2</sub> phenotype.

## ICOS sustains T<sub>FH</sub> and allergic airway disease

300 ILC2s are the major innate producer of IL-13 during chronic AAD<sup>26</sup>, while Th2 cells are the  
301 major adaptive source<sup>1</sup>. Furthermore, human and mouse ILC2s have been shown to depend  
302 on ICOS/ICOS-L signalling for their homeostatic survival and ability to initiate AAD<sup>46</sup>. Despite  
303 this, in both allergen models studied here ICOS blockade did not significantly reduce IL-13<sup>+</sup>  
304 ILC2s, indicating that during established AAD ILC2s do require ICOS/ICOS-L signalling to  
305 function. Likewise, HDM induced IL-13<sup>+</sup> CD4<sup>+</sup> T cells showed a trend to decrease only in  
306 numbers upon ICOS-L blockade, consistent with the overall fall in gross cellular  
307 inflammation. While, ALT induced IL-13<sup>+</sup> CD4<sup>+</sup> T cells were significantly reduced both by  
308 proportion and total number. Thus Th2 cells may represent an indirect target of  $\alpha$ -ICOS-L. In  
309 combination with the observation that IL-13<sup>+</sup> CD4<sup>+</sup> T cells outnumber IL-13<sup>+</sup> ILCs in  
310 established disease, this indicates that CD4<sup>+</sup> T cells are the major source of IL-13 and are  
311 responsible for the reduction of IL-13 after ICOS-L targeting.

312

313 This study is the first to show that disrupting ICOS/ICOS-L interactions after the  
314 establishment of allergic disease is both capable of depleting germinal centre reactions and  
315 has the potential to be therapeutically beneficial. Previous work has focused on blocking  
316 ICOS or ICOS-L prophylactically, during the inception of allergic disease<sup>47-49</sup> or during an  
317 exacerbation<sup>47</sup> using less clinically relevant ovalbumin induced allergic disease models<sup>47-49</sup>  
318 rather than with ongoing allergen exposure with clinically relevant aeroallergens. Delivery of  
319 aeroallergens such as HDM directly to the airways and lungs in a chronic fashion better  
320 replicates human disease compared to intraperitoneal, skin sensitisation or short  
321 sensitisation and challenge models used in T<sub>FH</sub> studies to date<sup>13, 15, 16</sup>. Thereby, improving  
322 our understanding on the response and role of T<sub>FH</sub> in AAD. As  $\alpha$ -ICOS-L blockade during  
323 established disease targeted multiple facets of the disease it could be potentially  
324 advantageous compared to currently approved biological therapies, such as omalizumab  
325 (anti-IgE mAb)<sup>50</sup>, reslizumab (anti-IL-5 mAb)<sup>51</sup> and mepolizumab (IL-5 antagonist)<sup>52</sup>, which  
326 generally favour one arm of the allergic response over another. Furthermore, blocking ICOS

## ICOS sustains T<sub>FH</sub> and allergic airway disease

327 signalling has been proven to be safe and effective in two phase I clinical trials for systemic  
328 lupus erythematosus<sup>53</sup>.

329

330 The results of this study give new insight into the role of T<sub>FH</sub> in chronic AAD. Importantly, we  
331 show that T<sub>FH</sub> can be identified locally within the lungs in addition to secondary lymphoid  
332 organs. Critically, even during chronic allergen exposure ICOS-L is required for the  
333 maintenance of T<sub>FH</sub> and implicates  $\alpha$ -ICOS-L blockade as a useful therapeutic intervention.  
334 This could be particularly essential for patients with severe disease where steroid treatment  
335 alone is not sufficient to control symptoms.

336

ICOS sustains T<sub>FH</sub> and allergic airway disease

## 337 **MATERIALS AND METHODS**

### 338 *Mice*

339 6-8 week old female BALB/c mice were purchased from Charles River Laboratories (UK)  
340 and IL-13<sup>GFP</sup> reporter mice were gifted from the lab of Professor Andrew McKenzie,  
341 University of Cambridge. Mice were housed in IVCs and all procedures were approved by  
342 the Imperial College London Animal Welfare Ethical Review Body (AWERB) and the United  
343 Kingdom Home Office (Approval from both under project licence number 70/7463) and  
344 conducted in accordance with the Animals (Scientific Procedures) Act 1986. All animal  
345 experiments are compliance with the ARRIVE guidelines. Mice were anaesthetised via  
346 inhalation of isoflurane and euthanized by intraperitoneal overdose of pentobarbitone or low  
347 dose pentobarbitone with ketamine, using exsanguination via a peripheral vein as a  
348 secondary means of confirmation.

349

### 350 *Induction of allergic airway disease and ICOS-L intervention*

351 Mice were administered 25 µg house dust mite (HDM) extract (*Dermatophagoides*  
352 *pteronyssinus*) or 10 µg *Alternaria alternata* (ALT) reconstituted in 25 µl PBS intranasally  
353 (i.n.) 3 times a week for up to 5 weeks (Greer Laboratories, NC, USA; Citeq, Groningen, The  
354 Netherlands). Control mice were given 25 µl PBS. In blocking experiments, from week 4  
355 onwards, mice were co-administered 150 µg anti-ICOS-Ligand (Clone: HK5.3, BioXCell, NH,  
356 USA) or isotype control (Clone: 2A3, BioXCell, NH, USA) antibody in 200 µl PBS via  
357 intraperitoneal (i.p.) injection 3 times a week for 2 weeks. Mice were culled at the end of  
358 week 5. All mice were harvested 18 hours after the final allergen dose.

359

### 360 *Tissue Processing*

361 Lung cells were disaggregated by incubating chopped tissue at 37 °C for 45 minutes in  
362 complete media (RPMI with 10% fetal calf serum, 2 mM L-glutamine and 100U/ml  
363 Penicillin/Streptomycin) containing 0.15 mg/ml collagenase type D (Roche Diagnostics,

## ICOS sustains T<sub>FH</sub> and allergic airway disease

364 Burgess Hill, UK) and 25 µg/ml DNase type 1 (Roche Diagnostics). Splenic, mediastinal  
365 lymph node (mLN) and lung cells were recovered by filtering through a 100 µM nylon sieve  
366 and washing in complete media. Lung and splenic cells were then treated with red blood cell  
367 lysis buffer (155 mM ammonium chloride, 10 mM potassium bicarbonate and 0.1 mM  
368 Disodium EDTA) for 5 mins, washed and resuspended in complete media. Bronchoalveolar  
369 lavage (BAL) was collected by washing the airways three times with 0.4ml PBS via a  
370 tracheal cannula. BAL cells were pelleted and resuspended in 0.5ml complete media. Viable  
371 cells were counted by haemocytometer using trypan blue exclusion. Serum was acquired by  
372 collecting blood from a peripheral artery using Na-EDTA coated capillaries and centrifuging  
373 at 12,000 g for 15 mins.

374

### 375 *Flow cytometry assessment*

376 Lung, BAL, mLN and splenic cells were stained for flow cytometric analysis. For surface  
377 markers, cells suspensions were stained in flow cytometry buffer (PBS containing 2% fetal  
378 calf serum and 2mM EDTA). To reduce non-specific binding, cell suspensions were  
379 incubated with antibody cocktails containing anti-Fc receptor binding antibody (anti-  
380 CD16/32). Cells were extracellularly stained in antibody cocktails for 30mins at 4°C, apart  
381 from stains containing CXCR5 which were incubated at room temperature in the dark for 1  
382 hour. For detection of intracellular cytokines, cells were incubated with 50 ng/ml phorbol  
383 myristate acetate, 500 ng/ml ionomycin and 10 µg/ml brefeldin A for 5 hours at 37 °C, 5%  
384 CO<sub>2</sub>. Cells were fixed with 1% paraformaldehyde. For detection of intranuclear transcription  
385 factors, cells were fixed and permeabilised using the Foxp3/Transcriptional factor staining  
386 buffer set (eBioscience, CA, USA) according to the manufacturer's instructions. Cells were  
387 then washed and intracellularly stained for between 30 and 60 mins at 4°C in  
388 permeabilization wash buffer (Biolegend, CA, USA). Flow cytometry data was acquired using  
389 an LSRII Fortessa (Becton Dickson, NJ, USA) and analysed using the FlowJo 10 software  
390 (FlowJo, OR, USA). Flow cytometry antibodies are listed in the Table S1.

391



## ICOS sustains T<sub>FH</sub> and allergic airway disease

### 392 *Assessment of lung function*

393 Airway hyper-responsiveness was measured in anaesthetised and tracheotomised mice in  
394 response to increasing doses of methacholine (3–100 mg/ml; Sigma-Aldrich, MO, USA)  
395 using the flexiVent system (Scireq, Montreal, Canada) as previously described<sup>54</sup>.

396

### 397 *Antibody assessment*

398 Serum total IgE and IgG1 were measured using paired antibody ELISA sets from BD  
399 Pharmingen™ (Oxford, UK). Allergen specific IgE and IgG1 levels were measured by  
400 coating plates with the appropriate allergen, adding serially diluted serum and biotinylated  
401 IgG1 or IgE (BD Pharmingen™, Oxford, UK). End-point titre was calculated using  
402 baseline+2xSD based on naïve animals.

403

### 404 *Cytokine analysis*

405 Lung IL-13 and IL-17A were determined using the eBioscience Ready Set Go Kit  
406 (eBioscience, CA, USA). Lung eotaxin-2 was measured using the mouse CCL24/Eotaxin-2  
407 DuoSet ELISA (R&D systems, MN, USA). Paired antibodies for murine IL-5 (R&D Systems,  
408 Abington, UK) were used in a standardised sandwich ELISA. All ELISAs were performed  
409 according to the manufacturer's instructions.

410

### 411 *Statistical analysis*

412 Statistical significance between groups was determined using the Mann Whitney U Test and  
413 all statistical tests were performed using Prism 6 (GraphPad Software Inc, CA, USA). All *P*  
414 values  $\leq 0.05$  (\*)  $\leq 0.01$  (\*\*),  $\leq 0.001$  (\*\*\*) and  $\leq 0.0001$  (\*\*\*\*) were considered significant.

ICOS sustains T<sub>FH</sub> and allergic airway disease

415 **ACKNOWLEDGEMENTS**

416 Thanks to Professor Andrew McKenzie, University of Cambridge for gifting us the IL-13<sup>GFP</sup>  
417 reporter mice. We would like to thank Catherine Simpson, Jane Srivastava and Jess Rowley  
418 from the Imperial College London, Flow Cytometry Facility. Furthermore, we want to  
419 acknowledge Lorraine Lawrence of the Research Histology Facility for carrying out the lung  
420 lobe embedding, sectioning and staining for histological analysis. This work was supported  
421 by a Sir Henry Dale Fellowship (101372/Z/13/Z) from the Wellcome Trust, UK and the Royal  
422 Society, UK to J.A.H. and a Wellcome Trust Senior Fellowship (107059/Z/15/Z) to C.M.L. In  
423 addition to a studentship from the MRC & Asthma UK Centre in Allergic Mechanism of  
424 Asthma awarded to F.I.U.

425

426 **AUTHOR CONTRIBUTION**

427 F.I.U, J.A.H and C.M.L designed experiments. Experimental work was also carried out by  
428 F.I.U, J.A.H, C.J.P and S.A.W and analysed by F.I.U. The manuscript was written by F.I.U  
429 in collaboration with J.A.H and C.M.L who both provided feedback.

430

431 **DISCLOSURE**

432 All authors declare no conflicts of interest.

433

## ICOS sustains T<sub>FH</sub> and allergic airway disease

### 434 REFERENCES

- 435 1. Lambrecht BN, Hammad H. The immunology of asthma. *Nat Immunol* 2015; **16**(1):  
436 45-56.  
437
- 438 2. Vinuesa CG, Linterman MA, Yu D, MacLennan IC. Follicular helper T cells. *Annual*  
439 *review of immunology* 2016; **34**: 335-368.  
440
- 441 3. Breitfeld D, Ohi L, Kremmer E, Ellwart J, Sallusto F, Lipp M *et al.* Follicular B Helper  
442 T Cells Express Cxc Chemokine Receptor 5, Localize to B Cell Follicles, and Support  
443 Immunoglobulin Production. *The Journal of Experimental Medicine* 2000; **192**(11):  
444 1545-1552.  
445
- 446 4. Schaerli P, Willimann K, Lang AB, Lipp M, Loetscher P, Moser B. Cxc Chemokine  
447 Receptor 5 Expression Defines Follicular Homing T Cells with B Cell Helper  
448 Function. *The Journal of Experimental Medicine* 2000; **192**(11): 1553-1562.  
449
- 450 5. Johnston RJ, Poholek AC, DiToro D, Yusuf I, Eto D, Barnett B *et al.* Bcl6 and Blimp-1  
451 are reciprocal and antagonistic regulators of T follicular helper cell differentiation.  
452 *Science* 2009; **325**(5943): 1006-1010.  
453
- 454 6. Yu D, Rao S, Tsai LM, Lee SK, He Y, Sutcliffe EL *et al.* The transcriptional repressor  
455 Bcl-6 directs T follicular helper cell lineage commitment. *Immunity* 2009; **31**(3): 457-  
456 468.  
457
- 458 7. Nurieva RI, Chung Y, Martinez GJ, Yang XO, Tanaka S, Matskevitch TD *et al.* Bcl6  
459 Mediates the Development of T Follicular Helper Cells. *Science* 2009; **325**(5943):  
460 1001-1005.  
461
- 462 8. Goenka R, Barnett LG, Silver JS, O'Neill PJ, Hunter CA, Cancro MP *et al.* Cutting  
463 edge: dendritic cell-restricted antigen presentation initiates the follicular helper T cell  
464 program but cannot complete ultimate effector differentiation. *J Immunol* 2011;  
465 **187**(3): 1091-1095.  
466
- 467 9. Choi YS, Kageyama R, Eto D, Escobar TC, Johnston RJ, Monticelli L *et al.* ICOS  
468 receptor instructs T follicular helper cell versus effector cell differentiation via  
469 induction of the transcriptional repressor Bcl6. *Immunity* 2011; **34**(6): 932-946.  
470
- 471 10. Haynes NM, Allen CDC, Lesley R, Ansel KM, Killeen N, Cyster JG. Role of CXCR5  
472 and CCR7 in Follicular Th Cell Positioning and Appearance of a Programmed Cell  
473 Death Gene-1<sup>High</sup> Germinal Center-Associated Subpopulation. *The*  
474 *Journal of Immunology* 2007; **179**(8): 5099-5108.  
475
- 476 11. Deenick EK, Chan A, Ma CS, Gatto D, Schwartzberg PL, Brink R *et al.* Follicular  
477 helper T cell differentiation requires continuous antigen presentation that is  
478 independent of unique B cell signaling. *Immunity* 2010; **33**(2): 241-253.  
479
- 480 12. Nurieva RI, Chung Y, Hwang D, Yang XO, Kang HS, Ma L *et al.* Generation of T  
481 follicular helper cells is mediated by interleukin-21 but independent of T helper 1, 2,  
482 or 17 cell lineages. *Immunity* 2008; **29**(1): 138-149.  
483
- 484 13. Coquet JM, Schuijs MJ, Smyth MJ, Deswarte K, Beyaert R, Braun H *et al.*  
485 Interleukin-21-Producing CD4(+) T Cells Promote Type 2 Immunity to House Dust  
486 Mites. *Immunity* 2015; **43**(2): 318-330.

## ICOS sustains T<sub>FH</sub> and allergic airway disease

- 487  
488 14. Hondowicz BD, An D, Schenkel JM, Kim KS, Steach HR, Krishnamurty AT *et al.*  
489 Interleukin-2-Dependent Allergen-Specific Tissue-Resident Memory Cells Drive  
490 Asthma. *Immunity* 2016; **44**(1): 155-166.  
491  
492 15. Ballesteros-Tato A, Randall TD, Lund FE, Spolski R, Leonard WJ, Leon B. T  
493 Follicular Helper Cell Plasticity Shapes Pathogenic T Helper 2 Cell-Mediated  
494 Immunity to Inhaled House Dust Mite. *Immunity* 2016; **44**(2): 259-273.  
495  
496 16. Kobayashi T, Iijima K, Dent AL, Kita H. Follicular helper T cells mediate IgE antibody  
497 response to airborne allergens. *J Allergy Clin Immunol* 2017; **139**(1): 300-313 e307.  
498  
499 17. Noble A, Zhao J. Follicular helper T cells are responsible for IgE responses to Der p  
500 1 following house dust mite sensitization in mice. *Clin Exp Allergy* 2016; **46**(8): 1075-  
501 1082.  
502  
503 18. Zaretsky AG, Taylor JJ, King IL, Marshall FA, Mohrs M, Pearce EJ. T follicular helper  
504 cells differentiate from Th2 cells in response to helminth antigens. *The Journal of*  
505 *Experimental Medicine* 2009; **206**(5): 991-999.  
506  
507 19. Luthje K, Kallies A, Shimohakamada Y, Belz GT, Light A, Tarlinton DM *et al.* The  
508 development and fate of follicular helper T cells defined by an IL-21 reporter mouse.  
509 *Nat Immunol* 2012; **13**(5): 491-498.  
510  
511 20. Dong C, Juedes AE, Temann U-A, Shresta S, Allison JP, Ruddle NH *et al.* ICOS co-  
512 stimulatory receptor is essential for T-cell activation and function. *Nature* 2001;  
513 **409**(6816): 97-101.  
514  
515 21. Stone Erica L, Pepper M, Katayama Carol D, Kerdiles Yann M, Lai C-Y, Emslie E *et*  
516 *al.* ICOS Coreceptor Signaling Inactivates the Transcription Factor FOXO1 to  
517 Promote Tfh Cell Differentiation. *Immunity* 2015; **42**(2): 239-251.  
518  
519 22. Weber JP, Fuhrmann F, Feist RK, Lahmann A, Al Baz MS, Gentz LJ *et al.* ICOS  
520 maintains the T follicular helper cell phenotype by down-regulating Kruppel-like factor  
521 2. *J Exp Med* 2015; **212**(2): 217-233.  
522  
523 23. Johnson JR, Wiley RE, Fattouh R, Swirski FK, Gajewska BU, Coyle AJ *et al.*  
524 Continuous exposure to house dust mite elicits chronic airway inflammation and  
525 structural remodeling. *Am J Respir Crit Care Med* 2004; **169**(3): 378-385.  
526  
527 24. Castanhinha S, Sherburn R, Walker S, Gupta A, Bossley CJ, Buckley J *et al.*  
528 Pediatric severe asthma with fungal sensitization is mediated by steroid-resistant IL-  
529 33. *Journal of Allergy and Clinical Immunology* 2015; **136**(2): 312-322.e317.  
530  
531 25. Gregory L, Causton B, Murdoch J, Mathie S, O'donnell V, Thomas C *et al.* Inhaled  
532 house dust mite induces pulmonary T helper 2 cytokine production. *Clinical &*  
533 *Experimental Allergy* 2009; **39**(10): 1597-1610.  
534  
535 26. Barlow JL, Bellosi A, Hardman CS, Drynan LF, Wong SH, Cruickshank JP *et al.*  
536 Innate IL-13-producing nuocytes arise during allergic lung inflammation and  
537 contribute to airways hyperreactivity. *Journal of Allergy and Clinical Immunology*  
538 2012; **129**(1): 191-198.e194.  
539

## ICOS sustains T<sub>FH</sub> and allergic airway disease

- 540 27. Fahey LM, Wilson EB, Elsaesser H, Fistonich CD, McGavern DB, Brooks DG. Viral  
541 persistence redirects CD4 T cell differentiation toward T follicular helper cells. *J Exp*  
542 *Med* 2011; **208**(5): 987-999.  
543
- 544 28. Harker JA, Lewis GM, Mack L, Zuniga EI. Late Interleukin-6 Escalates T Follicular  
545 Helper Cell Responses and Controls a Chronic Viral Infection. *Science* 2011;  
546 **334**(6057): 825-829.  
547
- 548 29. Boyden AW, Legge KL, Waldschmidt TJ. Pulmonary Infection with Influenza A Virus  
549 Induces Site-Specific Germinal Center and T Follicular Helper Cell Responses.  
550 *PLOS ONE* 2012; **7**(7): e40733.  
551
- 552 30. Linterman MA, Pierson W, Lee SK, Kallies A, Kawamoto S, Rayner TF *et al.* Foxp3+  
553 follicular regulatory T cells control the germinal center response. *Nat Med* 2011;  
554 **17**(8): 975-982.  
555
- 556 31. Baumjohann D, Preite S, Reboldi A, Ronchi F, Ansel KM, Lanzavecchia A *et al.*  
557 Persistent Antigen and Germinal Center B Cells Sustain T Follicular Helper Cell  
558 Responses and Phenotype. *Immunity* 2013; **38**(3): 596-605.  
559
- 560 32. Lindqvist M, van Lunzen J, Soghoian DZ, Kuhl BD, Ranasinghe S, Kranias G *et al.*  
561 Expansion of HIV-specific T follicular helper cells in chronic HIV infection. *The*  
562 *Journal of Clinical Investigation* 2012; **122**(9): 3271-3280.  
563
- 564 33. Zhang YN, Song J, Wang H, Wang H, Zeng M, Zhai GT *et al.* Nasal IL-  
565 4(+)/CXCR5(+)/CD4(+) T follicular helper cell counts correlate with local IgE  
566 production in eosinophilic nasal polyps. *J Allergy Clin Immunol* 2016; **137**(2): 462-  
567 473.  
568
- 569 34. Chu Y, Wang F, Zhou M, Chen L, Lu Y. A preliminary study on the characterization of  
570 follicular helper T (Tfh) cells in rheumatoid arthritis synovium. *Acta Histochemica*  
571 2014; **116**(3): 539-543.  
572
- 573 35. Jia Y, Zeng Z, Li Y, Li Z, Jin L, Zhang Z *et al.* Impaired Function of CD4+ T Follicular  
574 Helper (Tfh) Cells Associated with Hepatocellular Carcinoma Progression. *PLOS*  
575 *ONE* 2015; **10**(2): e0117458.  
576
- 577 36. Tripodo C, Petta S, Guarnotta C, Pipitone R, Cabibi D, Colombo MP *et al.* Liver  
578 follicular helper T-cells predict the achievement of virological response following  
579 interferon-based treatment in HCV-infected patients. *Antiviral therapy* 2012; **17**(1):  
580 111.  
581
- 582 37. Elliot JG, Jensen CM, Mutavdzic S, Lamb JP, Carroll NG, James AL. Aggregations of  
583 lymphoid cells in the airways of nonsmokers, smokers, and subjects with asthma. *Am*  
584 *J Respir Crit Care Med* 2004; **169**(6): 712-718.  
585
- 586 38. Grimbacher B, Hutloff A, Schlesier M, Glocker E, Warnatz K, Drager R *et al.*  
587 Homozygous loss of ICOS is associated with adult-onset common variable  
588 immunodeficiency. *Nat Immunol* 2003; **4**(3): 261-268.  
589
- 590 39. Vinuesa CG, Cook MC, Angelucci C, Athanasopoulos V, Rui L, Hill KM *et al.* A  
591 RING-type ubiquitin ligase family member required to repress follicular helper T cells  
592 and autoimmunity. *Nature* 2005; **435**(7041): 452-458.  
593

## ICOS sustains T<sub>FH</sub> and allergic airway disease

- 594 40. Pratama A, Ramiscal Roybel R, Silva Diego G, Das Souvik K, Athanasopoulos V,  
595 Fitch J *et al.* Roquin-2 Shares Functions with Its Paralog Roquin-1 in the Repression  
596 of mRNAs Controlling T Follicular Helper Cells and Systemic Inflammation. *Immunity*  
597 2013; **38**(4): 669-680.  
598
- 599 41. Waldmann TA, Iio A, Ogawa M, McIntyre OR, Strober W. The Metabolism of IgE.  
600 *Studies in Normal Individuals and in a Patient with IgE Myeloma* 1976; **117**(4): 1139-  
601 1144.  
602
- 603 42. Lawrence MG, Woodfolk JA, Schuyler AJ, Stillman LC, Chapman MD, Platts-Mills  
604 TA. Half-life of IgE in serum and skin: Consequences for anti-IgE therapy in patients  
605 with allergic disease. *J Allergy Clin Immunol* 2017; **139**(2): 422-428 e424.  
606
- 607 43. Kearley J, Erjefalt JS, Andersson C, Benjamin E, Jones CP, Robichaud A *et al.* IL-9  
608 Governs Allergen-induced Mast Cell Numbers in the Lung and Chronic Remodeling  
609 of the Airways. *American Journal of Respiratory and Critical Care Medicine* 2011;  
610 **183**(7): 865-875.  
611
- 612 44. Grünig G, Warnock M, Wakil AE, Venkayya R, Brombacher F, Rennick DM *et al.*  
613 Requirement for IL-13 Independently of IL-4 in Experimental Asthma. *Science* 1998;  
614 **282**(5397): 2261-2263.  
615
- 616 45. Wills-Karp M, Luyimbazi J, Xu X, Schofield B, Neben TY, Karp CL *et al.* Interleukin-  
617 13: Central Mediator of Allergic Asthma. *Science* 1998; **282**(5397): 2258-2261.  
618
- 619 46. Maazi H, Patel N, Sankaranarayanan I, Suzuki Y, Rigas D, Soroosh P *et al.*  
620 ICOS:ICOS-ligand interaction is required for type 2 innate lymphoid cell function,  
621 homeostasis, and induction of airway hyperreactivity. *Immunity* 2015; **42**(3): 538-551.  
622
- 623 47. Wiley RE, Goncharova S, Shea T, Johnson JR, Coyle AJ, Jordana M. Evaluation of  
624 inducible costimulator/B7-related protein-1 as a therapeutic target in a murine model  
625 of allergic airway inflammation. *Am J Respir Cell Mol Biol* 2003; **28**(6): 722-730.  
626
- 627 48. Coyle AJ, Lehar S, Lloyd C, Tian J, Delaney T, Manning S *et al.* The CD28-Related  
628 Molecule ICOS Is Required for Effective T Cell-Dependent Immune Responses.  
629 *Immunity* 2000; **13**(1): 95-105.  
630
- 631 49. Gonzalo JA, Tian J, Delaney T, Corcoran J, Rottman JB, Lora J *et al.* ICOS is critical  
632 for T helper cell-mediated lung mucosal inflammatory responses. *Nat Immunol* 2001;  
633 **2**(7): 597-604.  
634
- 635 50. Humbert M, Busse W, Hanania NA, Lowe PJ, Canvin J, Erpenbeck VJ *et al.*  
636 Omalizumab in Asthma: An Update on Recent Developments. *The Journal of Allergy*  
637 *and Clinical Immunology: In Practice* 2014; **2**(5): 525-536.e521.  
638
- 639 51. Castro M, Zangrilli J, Wechsler ME, Bateman ED, Brusselle GG, Bardin P *et al.*  
640 Reslizumab for inadequately controlled asthma with elevated blood eosinophil  
641 counts: results from two multicentre, parallel, double-blind, randomised, placebo-  
642 controlled, phase 3 trials. *The Lancet Respiratory Medicine* 2015; **3**(5): 355-366.  
643
- 644 52. Ortega HG, Liu MC, Pavord ID, Brusselle GG, FitzGerald JM, Chetta A *et al.*  
645 Mepolizumab Treatment in Patients with Severe Eosinophilic Asthma. *New England*  
646 *Journal of Medicine* 2014; **371**(13): 1198-1207.  
647



## ICOS sustains T<sub>FH</sub> and allergic airway disease

- 648 53. Sullivan BA, Tsuji W, Kivitz A, Peng J, Arnold GE, Boedigheimer MJ *et al.* Inducible  
649 T-cell co-stimulator ligand (ICOSL) blockade leads to selective inhibition of anti-KLH  
650 IgG responses in subjects with systemic lupus erythematosus. *Lupus Science & Medicine* 2016; **3**(1).  
651  
652
- 653 54. Saglani S, Mathie SA, Gregory LG, Bell MJ, Bush A, Lloyd CM. Pathophysiological  
654 Features of Asthma Develop in Parallel in House Dust Mite–Exposed Neonatal Mice.  
655 *American Journal of Respiratory Cell and Molecular Biology* 2009; **41**(3): 281-289.  
656  
657
- 658
- 659
- 660
- 661

## ICOS sustains T<sub>FH</sub> and allergic airway disease

### 662 **FIGURE LEGENDS**

663

#### 664 **Figure 1: T<sub>FH</sub> accumulate over time in the lungs and peripheral tissues.**

665 Adult female BALB/c mice were exposed to either 25 µg house dust mite (HDM), 10 µg  
666 *alternaria alternata* (ALT) or 25 µl phosphate buffered saline (PBS), 3 times a week for up to  
667 5 weeks. Flow cytometry was used to determine the frequency of T<sub>FH</sub> within cellular  
668 compartments following allergen exposure. T<sub>FH</sub> were defined as CXCR5<sup>+</sup>PD1<sup>+</sup>Foxp3<sup>-</sup>CD4<sup>+</sup>  
669 lymphocytes **A)** Experimental set up. Left panel – HDM, Right panel – ALT. **B-C)** mediastinal  
670 lymph nodes (mLN), **D-E)** spleen, **F-G)** lungs. Statistical significance was determined using a  
671 Mann Whitney U test. \*  $P < 0.05$ , \*\*  $p < 0.01$ , \*\*\*  $p < 0.001$ , n=5 per time-point. Representative  
672 data from 2 independent experiments.

673

#### 674 **Figure 2: Allergen driven T<sub>FH</sub> generation precedes germinal centre formation and** 675 **antibody production.**

676 Adult female BALB/c mice were exposed to either 25 µg house dust mite (HDM), 10 µg  
677 *alternaria alternata* (ALT) or 25 µl phosphate buffered saline (PBS), 3 times a week for up to  
678 5 weeks. Flow cytometry was used to determine the frequency of germinal centre (GC) B  
679 cells in the mLN and lungs. GC B cell were defined as CD38<sup>-</sup>GL7<sup>+</sup>FAS<sup>+</sup>CD19<sup>+</sup>B220<sup>+</sup>  
680 lymphocytes and quantified. HDM study, **A)** mLN, **B)** Lungs, and ALT study, **C)** mLN, **D)**  
681 Lungs. Antibody within the serum was assessed by ELISA. **E)** HDM total IgE, **F)** HDM total  
682 IgG1, **G)** ALT total IgE, **H)** ALT total IgG1. Serum was titrated and allergen specific IgE and  
683 IgG1 was measured by ELISA. Endpoint titres are displayed. **I)** HDM-specific IgE, **J)** HDM-  
684 specific IgG1, **K)** ALT-specific IgE, **L)** ALT-specific IgG1. Statistical significance was  
685 determined using a Mann Whitney U test. \*  $P < 0.05$ , \*\*  $p < 0.01$ , \*\*\*  $p < 0.001$ . n=4-5 mice per  
686 time-point. Representative data from 2 independent experiments.

687

#### 688 **Figure 3: ICOS/ICOS-L interactions are required to sustain T<sub>FH</sub> during chronic AAD.**

689 Adult female BALB/c mice were exposed (i.n) to 25 µg house dust mite (HDM), 10 µg



## ICOS sustains T<sub>FH</sub> and allergic airway disease

690 *alternaria alternata* (ALT) or 25 µl phosphate buffered saline (PBS), 3 times a week for 5  
691 weeks. From the start of week 4 mice were also administered 150 µg anti-ICOS-L (α-ICOS-  
692 L) or isotype control (2A3) antibody (i.p) 3 times a week. Mice were culled at the end of week  
693 5. **A)** Representative flow plots of mLN and lung T<sub>FH</sub> following allergen and 2A3 or α-ICOS-L  
694 treatment, quantified in **B)** HDM mLN, **C)** HDM lung, **D)** ALT mLN, **E)** ALT lung. **F)**  
695 Representative flow plots of mLN and lung germinal centre (GC) B cells following allergen  
696 and 2A3 or α-ICOS-L treatment, quantified in **G)** HDM mLN, **H)** HDM lung, **I)** ALT mLN, **J)**  
697 ALT Lung. **K-N)** Serum was titrated and allergen specific antibody measured by ELISA.  
698 Endpoint titres are displayed. **K)** HDM specific IgE, **L)** ALT specific IgE, **M)** HDM specific  
699 IgG1, **N)** ALT specific IgE. Statistical significance was determined using a Mann Whitney U  
700 test. \*  $P < 0.05$ , \*\*  $p < 0.01$ , \*\*\*  $p < 0.001$ . HDM data shown is pooled from two independent  
701 experiments, n=8-12. ALT data is based on one study, n=4-6.

702

### 703 **Figure 4: Therapeutic ICOS-L blockade improves chronic allergic airway disease.**

704 Adult female BALB/c mice were exposed (i.n) to 25 µg house dust mite (HDM), 10 µg  
705 *alternaria alternata* (ALT) or 25 µl phosphate buffered saline (PBS), 3 times a week for 5  
706 weeks. From the start of week 4 mice were also administered 150 µg anti-ICOS-L (α-ICOS-  
707 L) or isotype control (2A3) antibody (i.p) 3 times a week. Mice were culled at the end of week  
708 5. Total number of cells in the lung, **A)** HDM study, **B)** ALT study. Total number of lung  
709 eosinophils, **C)** HDM study, **D)** ALT study. **E-H)** Airway hyperresponsiveness was measured  
710 by exposing mice to 0-100mg/ml methacholine (MCh) using the flexiVent system during  
711 HDM induced allergic airway disease. **E)** airway resistance, **F)** airway compliance and **G)**  
712 airway elastance, **H)** Quantification of airway elastance at 30mg/ml MCh. **I-L)** Airway  
713 hyperresponsiveness was measured during ALT induced allergic airway disease. **I)** airway  
714 resistance, **J)** airway compliance and **K)** airway elastance, **L)** Quantification of airway  
715 elastance at 30mg/ml MCh. Curves display mean±SEM. \* = statistical difference between  
716 allergen+2A3 and allergen+α-ICOS-L. Statistical significance was determined using a Mann

## ICOS sustains T<sub>FH</sub> and allergic airway disease

717 Whitney U test. \*  $P < 0.05$ , \*\*  $p < 0.01$ , \*\*\*  $p < 0.001$ . HDM data shown is pooled from two  
718 independent experiments,  $n = 8-12$ . ALT data is based on one study,  $n = 4-6$ .

719

720 **Figure 5: Therapeutic ICOS-L blockade reduces house dust mite induced pulmonary**  
721 **IL-13 and IL-17A.**

722 Adult female BALB/c mice were exposed (i.n) to 25  $\mu$ g house dust mite (HDM), 10  $\mu$ g  
723 *alternaria alternata* (ALT) or 25  $\mu$ l phosphate buffered saline (PBS), 3 times a week for 5  
724 weeks. From the start of week 4 mice were also administered 150  $\mu$ g anti-ICOS-L ( $\alpha$ -ICOS-  
725 L) or isotype control (2A3) antibody (i.p) 3 times a week. Mice were culled at the end of week  
726 5. Pulmonary cytokines and chemokines within the lung were measured by ELISA. IL-13 **A)**  
727 HDM study, **B)** ALT study. IL-17A **C)** HDM study, **D)** ALT study. IL-5, **E)** HDM Study, **F)** ALT  
728 study. Eotaxin-2, **G)** HDM study, **H)** ALT study. Statistical significance was determined using  
729 a Mann Whitney U test. \*  $P < 0.05$ , \*\*  $p < 0.01$ , \*\*\*  $p < 0.001$ . HDM data shown is pooled from two  
730 independent experiments,  $n = 8-12$ . ALT data is based on one study,  $n = 4-6$ .

731

732 **Figure 6: IL-13<sup>+</sup> CD4<sup>+</sup> T cells and ILCs are not directly targeted by ICOS-L blockade.**

733 **A-G)** Adult female BALB/c mice were exposed to either 25  $\mu$ g house dust mite (HDM), 10  $\mu$ g  
734 *alternaria alternata* (ALT) or 25  $\mu$ l phosphate buffered saline (PBS), 3 times a week for up to  
735 5 weeks. Flow cytometry was used to determine the frequency of lung cellular populations.

736 **A)** Representative gating of IL-13<sup>+</sup> CD4<sup>+</sup> T cells and ILCs following allergen and 2A3 or  $\alpha$ -  
737 ICOS-L treatment. **B)** Frequency IL-13<sup>+</sup> CD4<sup>+</sup> T cells – HDM study, **C)** Total IL-13<sup>+</sup> CD4<sup>+</sup> T  
738 cells – HDM study, **D)** Frequency of IL-13<sup>+</sup> CD4<sup>+</sup> T cells – ALT study, **E)** Total IL-13<sup>+</sup> CD4<sup>+</sup> T  
739 cells – ALT study, **F)** Total IL-13<sup>+</sup> ILCs – HDM study, **G)** Total IL-13<sup>+</sup> ILCs – ALT study. HDM  
740 data shown is pooled from two independent experiments,  $n = 8-12$ . ALT data is based on one  
741 study,  $n = 4-6$ . **H-J)** Adult female IL-13<sup>GFP</sup> reporter mice were exposed (i.n) to 25  $\mu$ g HDM or  
742 25  $\mu$ l PBS, 3 times a week for 3 weeks. Flow cytometry was used to determine the  
743 frequency of IL-13<sup>GFP</sup> cells. **H)** Representative flow plots of CXCR5<sup>+</sup> T cells and IL-13-GFP<sup>+</sup>

## ICOS sustains T<sub>FH</sub> and allergic airway disease

744 cells in PBS and HDM treated animals, pre-gated on CD4<sup>+</sup>CD3<sup>+</sup>CD44<sup>hi</sup>CD62L<sup>-</sup> lymphocytes.  
745 Quantification of IL-13<sup>GFP+</sup> T<sub>FH</sub> (CXCR5<sup>+</sup>PD1<sup>+</sup>CD4<sup>+</sup>CD44<sup>hi</sup>CD62L<sup>-</sup>) and T<sub>EFF</sub> cells (CXCR5<sup>-</sup>  
746 CD4<sup>+</sup>CD44<sup>hi</sup>CD62L<sup>-</sup>). I) mLN, J) Lung tissue. Data shown is pooled from two independent  
747 experiments, n=8-12. Statistical significance was determined using a Mann Whitney U test. \*  
748  $P < 0.05$ , \*\* $p < 0.01$ , \*\*\* $p < 0.001$ .  
749

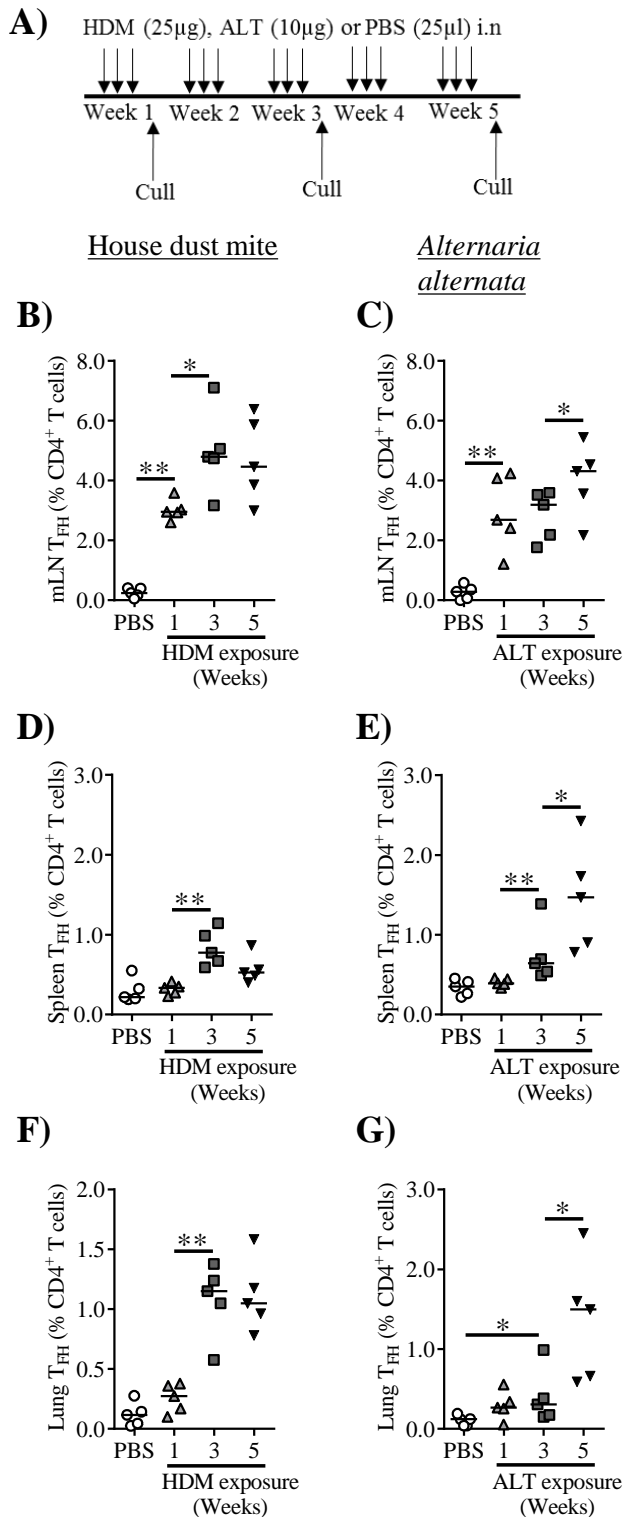

**Figure 1: T follicular helper cells (T<sub>FH</sub>) accumulate over time in the lungs and peripheral tissues.** Adult female BALB/c mice were exposed to either 25 µg house dust mite (HDM), 10 µg *alternaria alternata* (ALT) or 25 µl phosphate buffered saline (PBS), 3 times a week for up to 5 weeks. Flow cytometry was used to determine the frequency of T<sub>FH</sub> within cellular compartments following allergen exposure. T<sub>FH</sub> were defined as CXCR5<sup>+</sup>PD1<sup>+</sup>Foxp3<sup>-</sup>CD4<sup>+</sup> lymphocytes **A)** Experimental set up. Left panel – HDM, Right panel – ALT. **B-C)** mediastinal lymph nodes (mLN), **D-E)** spleen, **F-G)** lungs. Statistical significance was determined using a Mann Whitney U test. \*  $P < 0.05$ , \*\*  $p < 0.01$ , \*\*\*  $p < 0.001$ ,  $n = 5$  per time-point. Representative data from 2 independent experiments.

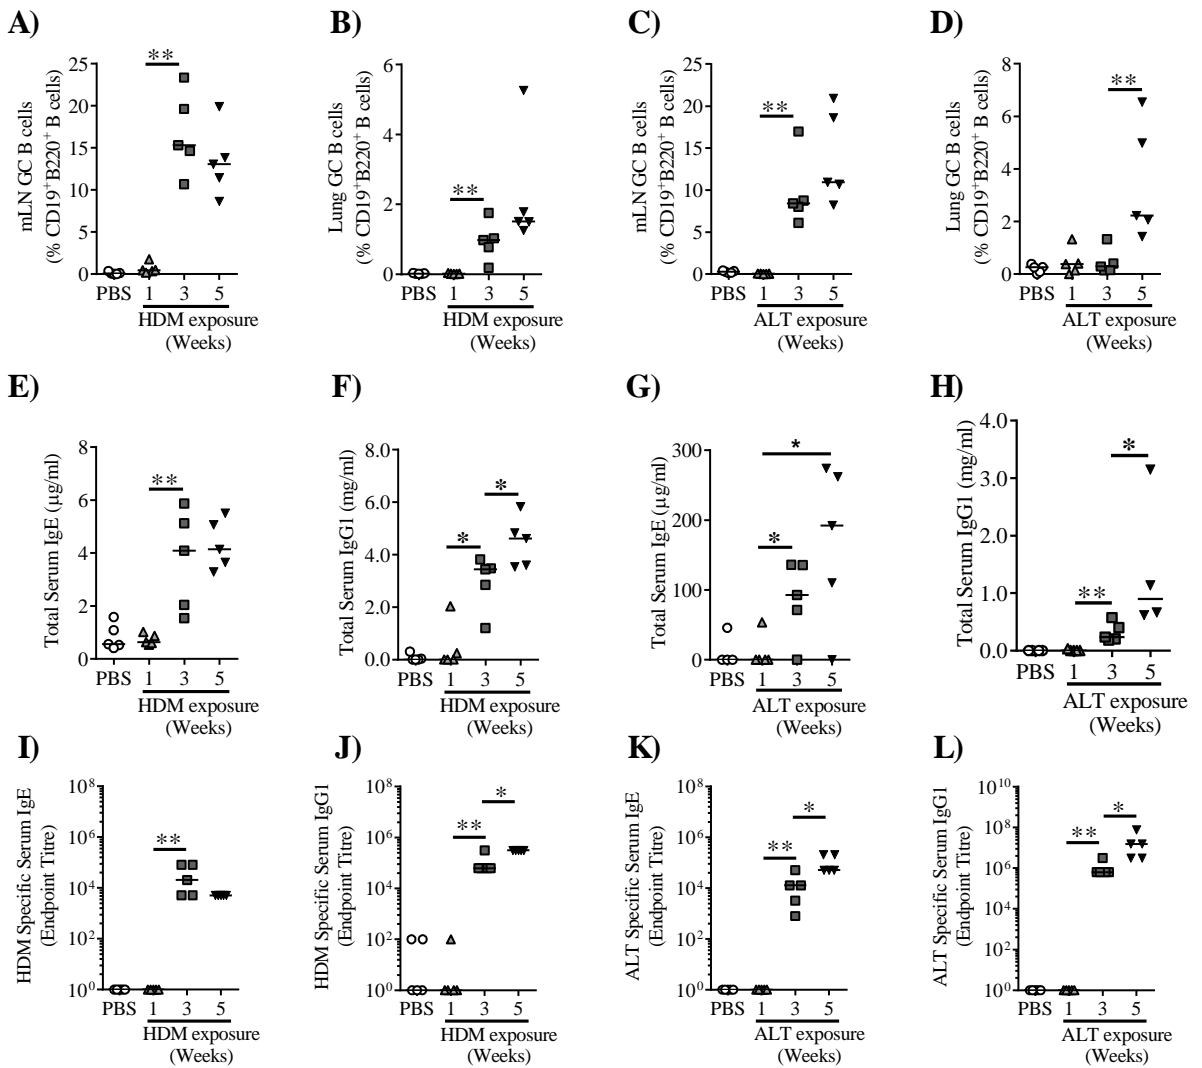

**Figure 2: Allergen driven  $T_{FH}$  generation precedes germinal centre formation and antibody production.** Adult female BALB/c mice were exposed to either 25  $\mu$ g house dust mite (HDM), 10  $\mu$ g *alternaria alternata* (ALT) or 25  $\mu$ l phosphate buffered saline (PBS), 3 times a week for up to 5 weeks. Flow cytometry was used to determine the frequency of germinal centre (GC) B cells in the mLN and lungs. GC B cell were defined as CD38<sup>+</sup>GL7<sup>+</sup>FAS<sup>+</sup>CD19<sup>+</sup>B220<sup>+</sup> lymphocytes and quantified. HDM study, **A)** mLN, **B)** Lungs, and ALT study, **C)** mLN, **D)** Lungs. Antibody within the serum was assessed by ELISA. **E)** HDM total IgE, **F)** HDM total IgG1, **G)** ALT total IgE, **H)** ALT total IgG1. Serum was titrated and allergen specific IgE and IgG1 was measured by ELISA. Endpoint titres are displayed. **I)** HDM-specific IgE, **J)** HDM-specific IgG1, **K)** ALT-specific IgE, **L)** ALT-specific IgG1. Statistical significance was determined using a Mann Whitney U test. \*  $P < 0.05$ , \*\*  $p < 0.01$ , \*\*\*  $p < 0.001$ .  $n = 4-5$  mice per time-point. Representative data from 2 independent experiments.

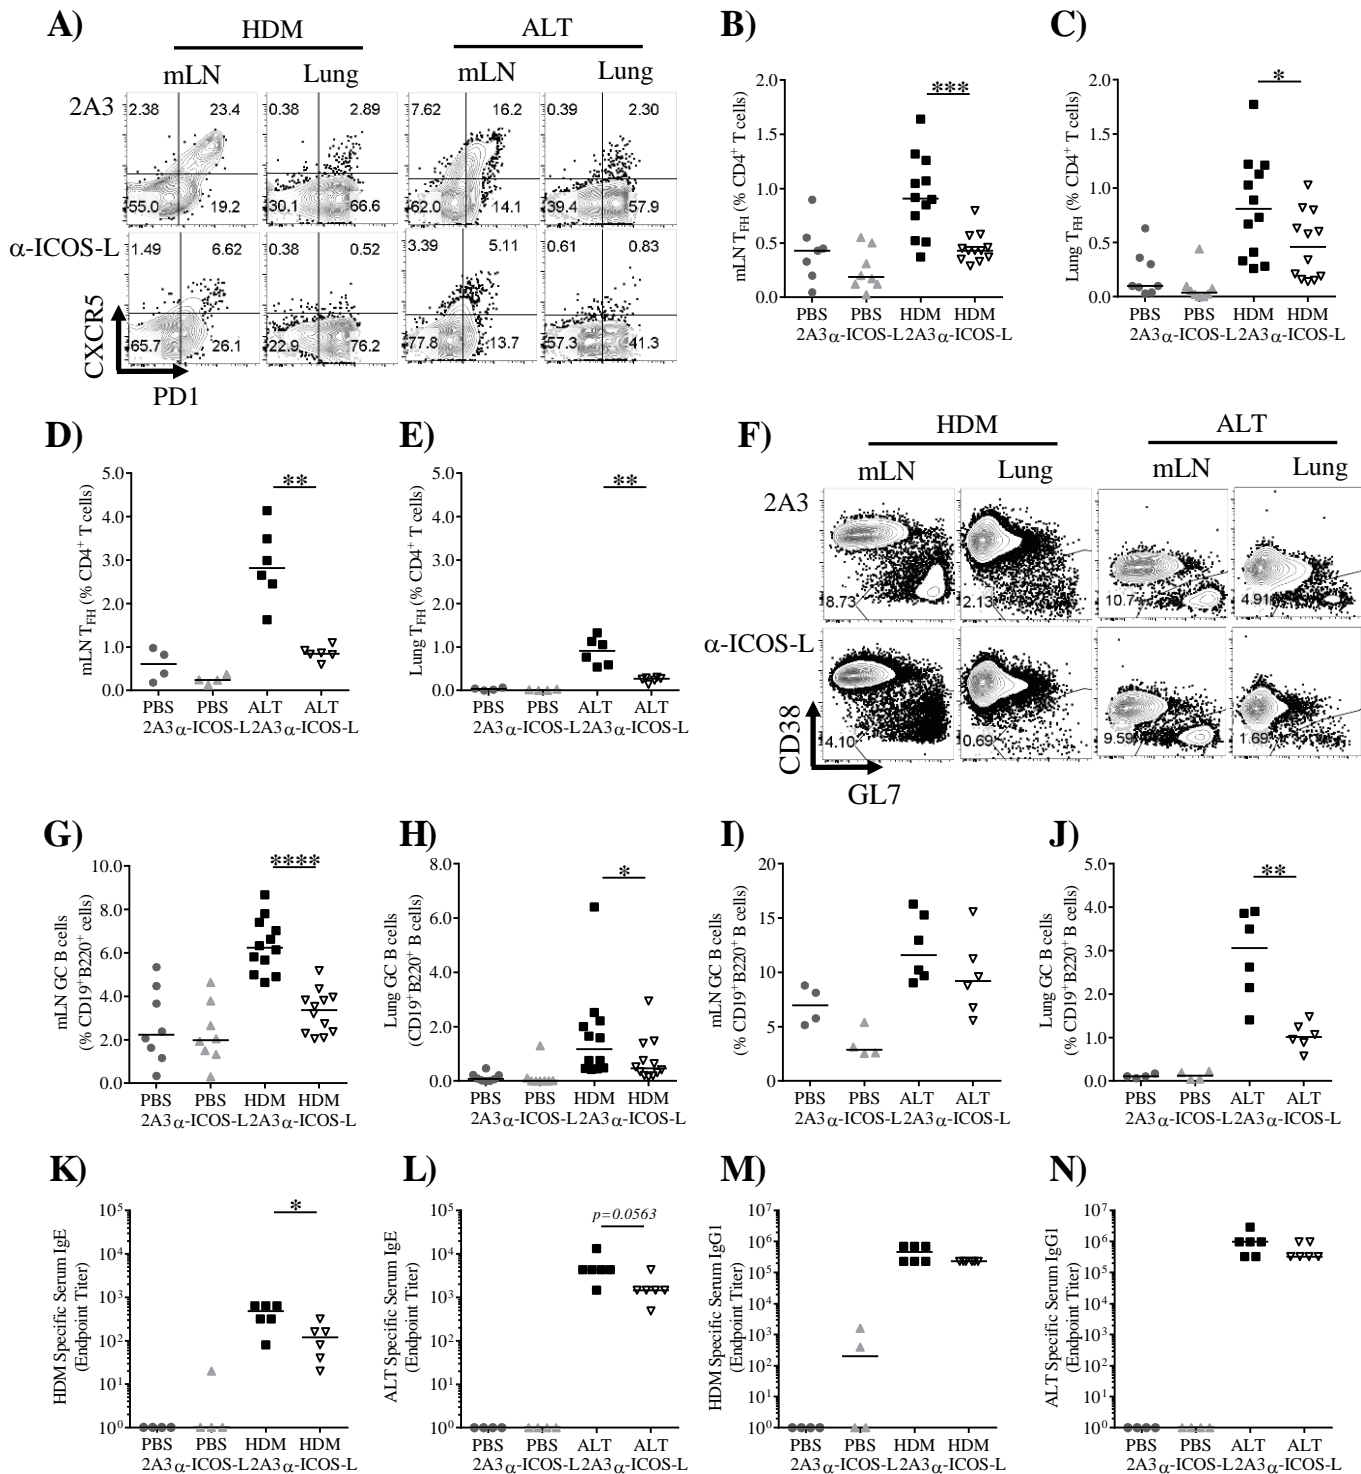

**Figure 3: ICOS/ICOS-L interactions are required to sustain  $T_{FH}$  during chronic AAD.**

Adult female BALB/c mice were exposed (i.n) to 25  $\mu$ g house dust mite (HDM), 10  $\mu$ g *alternaria alternata* (ALT) or 25  $\mu$ l phosphate buffered saline (PBS), 3 times a week for 5 weeks. From the start of week 4 mice were also administered 150  $\mu$ g anti-ICOS-L ( $\alpha$ -ICOS-L) or isotype control (2A3) antibody (i.p) 3 times a week. Mice were culled at the end of week 5. **A)** Representative flow plots of mLN and lung  $T_{FH}$  following allergen and 2A3 or  $\alpha$ -ICOS-L treatment, quantified in **B)** HDM mLN, **C)** HDM lung, **D)** ALT mLN, **E)** ALT lung. **F)** Representative flow plots of mLN and lung germinal centre (GC) B cells following allergen and 2A3 or  $\alpha$ -ICOS-L treatment, quantified in **G)** HDM mLN, **H)** HDM lung, **I)** ALT mLN, **J)** ALT Lung. **K-N)** Serum was titrated and allergen specific antibody measured by ELISA. Endpoint titres are displayed. **K)** HDM specific IgE, **L)** ALT specific IgE, **M)** HDM specific IgG1, **N)** ALT specific IgE. Statistical significance was determined using a Mann Whitney U test. \*  $P < 0.05$ , \*\*  $p < 0.01$ , \*\*\*  $p < 0.001$ . HDM data shown is pooled from two independent experiments,  $n = 8-12$ . ALT data is based on one study,  $n = 4-6$ .

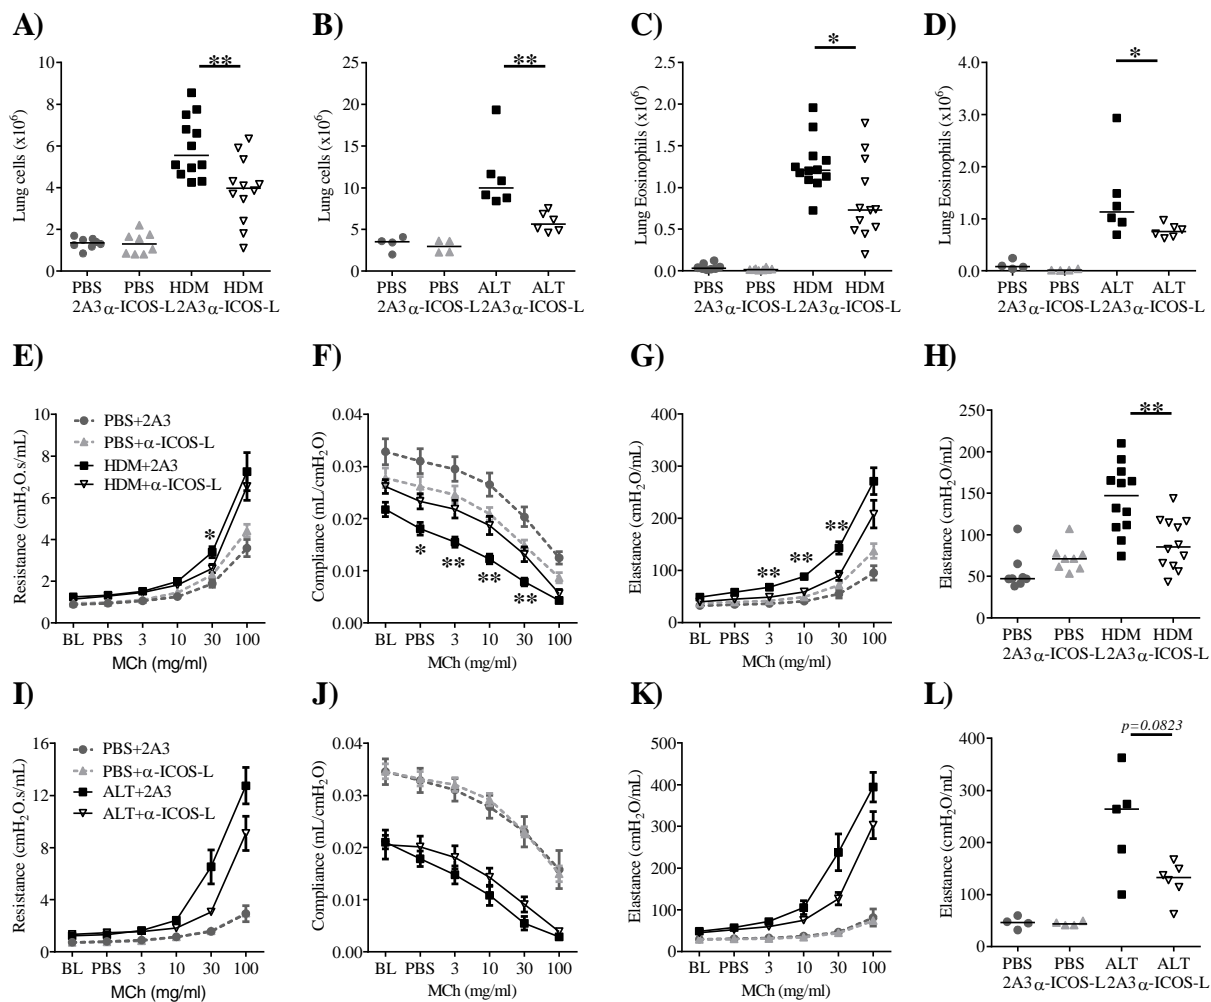

**Figure 4: Therapeutic ICOS-L blockade improves chronic allergic airway disease.**

Adult female BALB/c mice were exposed (i.n) to 25  $\mu$ g house dust mite (HDM), 10  $\mu$ g *alternaria alternata* (ALT) or 25  $\mu$ l phosphate buffered saline (PBS), 3 times a week for 5 weeks. From the start of week 4 mice were also administered 150  $\mu$ g anti-ICOS-L ( $\alpha$ -ICOS-L) or isotype control (2A3) antibody (i.p) 3 times a week. Mice were culled at the end of week 5. Total number of cells in the lung, **A)** HDM study, **B)** ALT study. Total number of lung eosinophils, **C)** HDM study, **D)** ALT study. **E-H)** Airway hyperresponsiveness was measured by exposing mice to 0-100mg/ml methacholine (MCh) using the flexiVent system during HDM induced allergic airway disease. **E)** airway resistance, **F)** airway compliance and **G)** airway elastance, **H)** Quantification of airway elastance at 30mg/ml MCh. **I-L)** Airway hyperresponsiveness was measured during ALT induced allergic airway disease. **I)** airway resistance, **J)** airway compliance and **K)** airway elastance, **L)** Quantification of airway elastance at 30mg/ml MCh. Curves display mean $\pm$ SEM. \* = statistical difference between allergen+2A3 and allergen+ $\alpha$ -ICOS-L. Statistical significance was determined using a Mann Whitney U test. \*  $P<0.05$ , \*\* $p<0.01$ , \*\*\* $p<0.001$ . HDM data shown is pooled from two independent experiments, n=8-12. ALT data is based on one study, n=4-6.

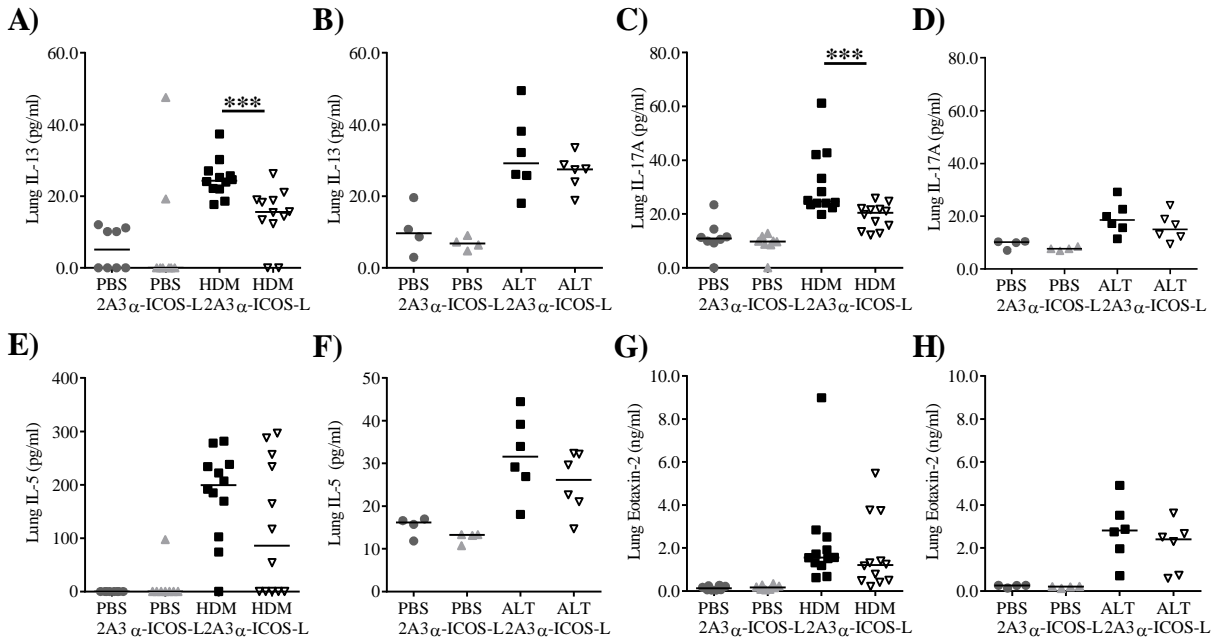

**Figure 5: Therapeutic ICOS-L blockade reduces house dust mite induced pulmonary IL-13 and IL-17A.** Adult female BALB/c mice were exposed (i.n) to 25  $\mu$ g house dust mite (HDM), 10  $\mu$ g *alternaria alternata* (ALT) or 25  $\mu$ l phosphate buffered saline (PBS), 3 times a week for 5 weeks. From the start of week 4 mice were also administered 150  $\mu$ g anti-ICOS-L ( $\alpha$ -ICOS-L) or isotype control (2A3) antibody (i.p) 3 times a week. Mice were culled at the end of week 5. Pulmonary cytokines and chemokines within the lung were measured by ELISA. IL-13 **A)** HDM study, **B)** ALT study. IL-17A **C)** HDM study, **D)** ALT study. IL-5, **E)** HDM Study, **F)** ALT study. Eotaxin-2, **G)** HDM study, **H)** ALT study. Statistical significance was determined using a Mann Whitney U test. \*  $P < 0.05$ , \*\*  $p < 0.01$ , \*\*\*  $p < 0.001$ . HDM data shown is pooled from two independent experiments,  $n = 8-12$ . ALT data is based on one study,  $n = 4-6$ .



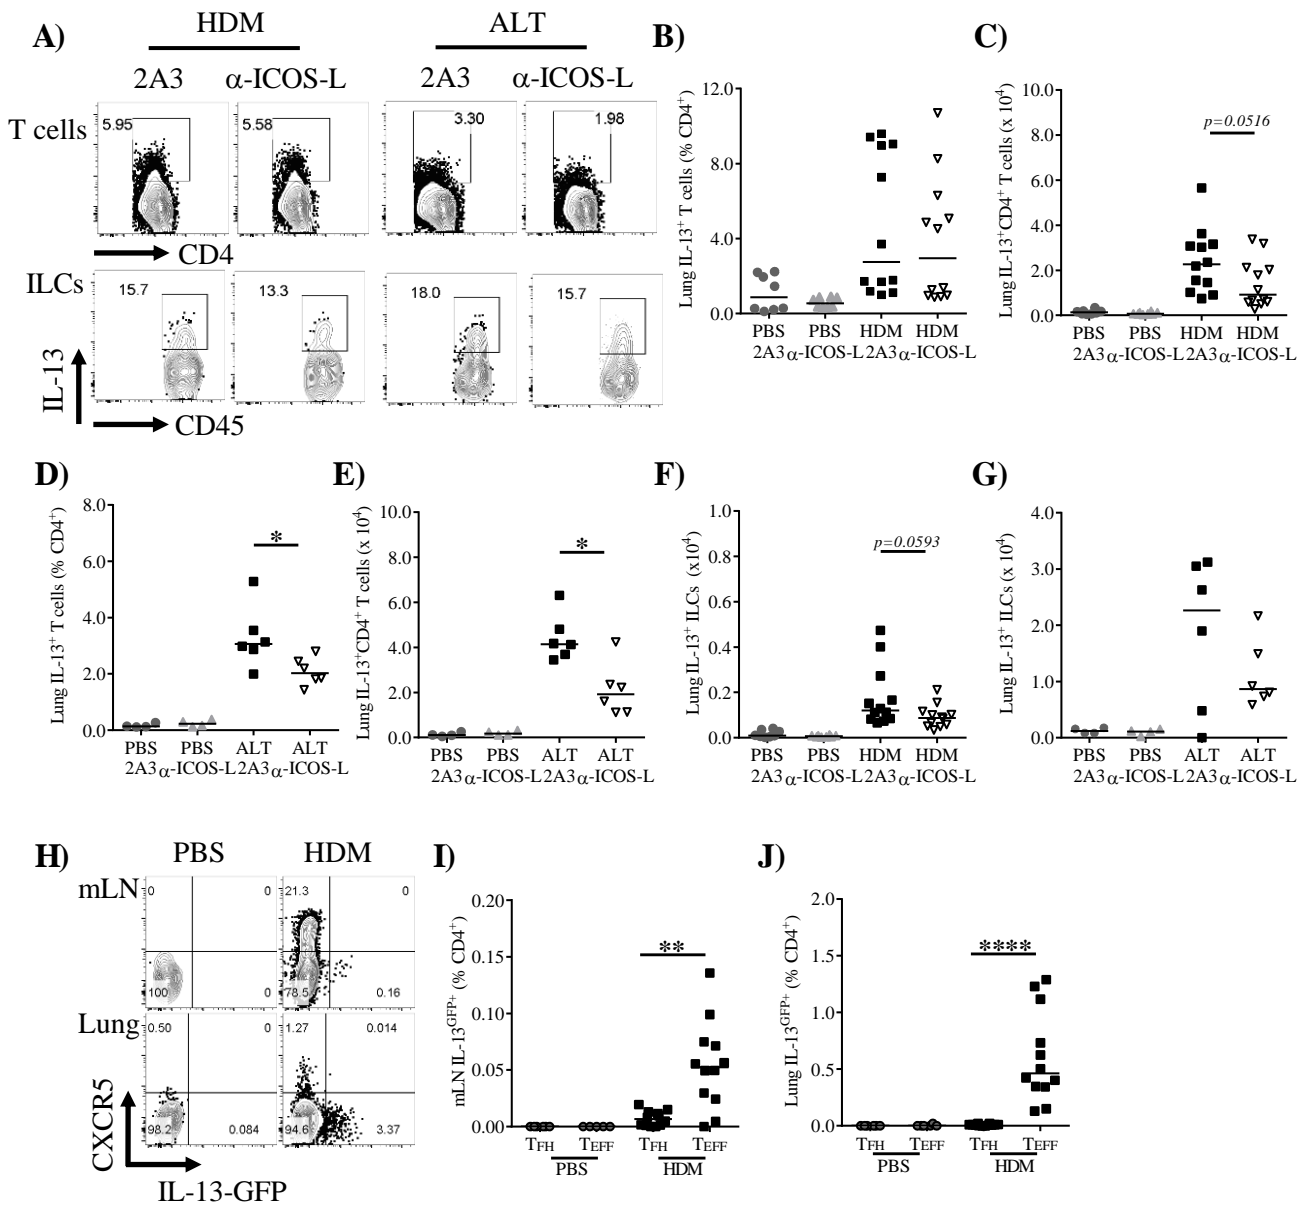

**Figure 6: IL-13<sup>+</sup> CD4<sup>+</sup> T cells and ILCs are not directly targeted by ICOS-L blockade.**

**A-G)** Adult female BALB/c mice were exposed to either 25  $\mu$ g house dust mite (HDM), 10  $\mu$ g *alternaria alternata* (ALT) or 25  $\mu$ l phosphate buffered saline (PBS), 3 times a week for up to 5 weeks. Flow cytometry was used to determine the frequency of lung cellular populations. **A)** Representative gating of IL-13<sup>+</sup> CD4<sup>+</sup> T cells and ILCs following allergen and 2A3 or  $\alpha$ -ICOS-L treatment. **B)** Frequency IL-13<sup>+</sup>CD4<sup>+</sup> T cells – HDM study, **C)** Total IL-13<sup>+</sup>CD4<sup>+</sup> T cells – HDM study, **D)** Frequency of IL-13<sup>+</sup>CD4<sup>+</sup> T cells – ALT study, **E)** Total IL-13<sup>+</sup>CD4<sup>+</sup> T cells – ALT study, **F)** Total IL-13<sup>+</sup> ILCs – HDM study, **G)** Total IL-13<sup>+</sup> ILCs – ALT study. HDM data shown is pooled from two independent experiments, n=8-12. ALT data is based on one study, n=4-6. **H-J)** Adult female IL-13<sup>GFP</sup> reporter mice were exposed (i.n) to 25  $\mu$ g HDM or 25  $\mu$ l PBS, 3 times a week for 3 weeks. Flow cytometry was used to determine the frequency of IL-13<sup>GFP</sup> cells. **H)** Representative flow plots of CXCR5<sup>+</sup> T cells and IL-13-GFP<sup>+</sup> cells in PBS and HDM treated animals, pre-gated on CD4<sup>+</sup>CD3<sup>+</sup>CD44<sup>hi</sup>CD62L<sup>-</sup> lymphocytes. Quantification of IL-13<sup>GFP</sup><sup>+</sup> T<sub>FH</sub> (CXCR5<sup>+</sup>PD1<sup>+</sup>CD4<sup>+</sup>CD44<sup>hi</sup>CD62L<sup>-</sup>) and T<sub>EFF</sub> cells (CXCR5<sup>-</sup>CD4<sup>+</sup>CD44<sup>hi</sup>CD62L<sup>-</sup>). **I)** mLN, **J)** Lung tissue. Data shown is pooled from two independent experiments, n=8-12. Statistical significance was determined using a Mann Whitney U test. \*  $P < 0.05$ , \*\*  $p < 0.01$ , \*\*\*  $p < 0.001$ .
